# Supplementary material for: Ionothermal synthesis of mesoporous SnO2 nanomaterials and their gas sensitivity depending on the reducing ability of toxic gases
Source: Royal Society of Chemistry journal article supplement (doi:10.1039/c3cp51663f), 2013-01-01
Supplement: c3cp51663f.pdf [file c3cp51663f.pdf]

# Supporting Information

## **Ionothermal Synthesis of Mesoporous SnO<sub>2</sub> Nanomaterials and Their Gas Sensitivity Depending on Reducing Ability of Toxic Gases**

*Wei Guo, Xiaochuan Duan, Yan Shen, Ke Zhen Qi, Caiying Wei and Wenjun Zheng\**

Department of Materials Chemistry, TKL of Metal and Molecule-Based Material Chemistry, and  
Key Laboratory of Advanced Energy Materials Chemistry (MOE), College of Chemistry, Nankai  
University. Tianjin 300071, P. R. China.

E-mail: zhwj@nankai.edu.cn

## Detailed Experiments

### *Synthesis:*

#### **Synthesis of mesoporous SnO<sub>2</sub> nanomaterials**

All the chemicals were of analytic grade and used without further purification. In a typical synthesis, 0.54 g of Na<sub>2</sub>SnO<sub>3</sub>·3H<sub>2</sub>O and 20 g of NH<sub>4</sub>Cl were mixed together, and then transferred into a 33 mL Teflon-lined stainless-steel autoclave at 180 °C for 10 h. After the reaction was conducted, the white solid was obtained by centrifugation, washed with absolute alcohol and distilled water for several times, respectively.

#### **Characterization**

The morphology and structural characteristics were observed using X-ray diffraction (XRD, Rigaku D/max 2500 diffractometer), high-resolution transmission electron microscopy (HRTEM, JEOL 2010) and nitrogen adsorption–desorption isotherms (ASAP 2020 nitrogen adsorption apparatus). The Brunauer–Emmett–Teller (BET) specific surface areas ( $S_{\text{BET}}$ ) were calculated using the BET equation. Desorption isotherm was used to determine the pore size distribution using the Barret–Joyner–Halender (BJH) method.

#### **Fabrication and analysis of gas sensor**

The gas sensor was fabricated according to the literatures.<sup>5, 18</sup> Typically, a proper amount of SnO<sub>2</sub> nanocrystals was grinded with several drops of water in an agate mortar to form a slurry. Then, the slurry was coated onto an alumina tube with a

diameter of 1mm and length of 4mm, positioned with two Au electrodes and four Pt wires on each end of the tube. A Ni-Cr alloy filament was put through the tube and used as a heater by tuning the heating voltage. Gas sensing tests were performed on a static test system (HW-30A, HanWei Electronics Co., Ltd., Henan Province, China) using air as the reference and diluting gas at a relative humidity (RH) of 38%. The sensor was placed in a transparent testing chamber with a volume of 15 L and aged for several days before analysis. Target gas such as ethanol was injected into the testing chamber by a micro-syringe. The sensor signal voltage ( $V_{out}$ ) was collected by a computer at a constant test voltage of 5V. The sensor response is defined as the ratio  $S = R_a/R_g$ , where  $R_g$  and  $R_a$  are the electrical resistance of the sensor in test gas and in air, respectively. The response and recovery time is defined as the time for sensor to reach 90% of its maximum response and falls to 10% of its maximum response, respectively.

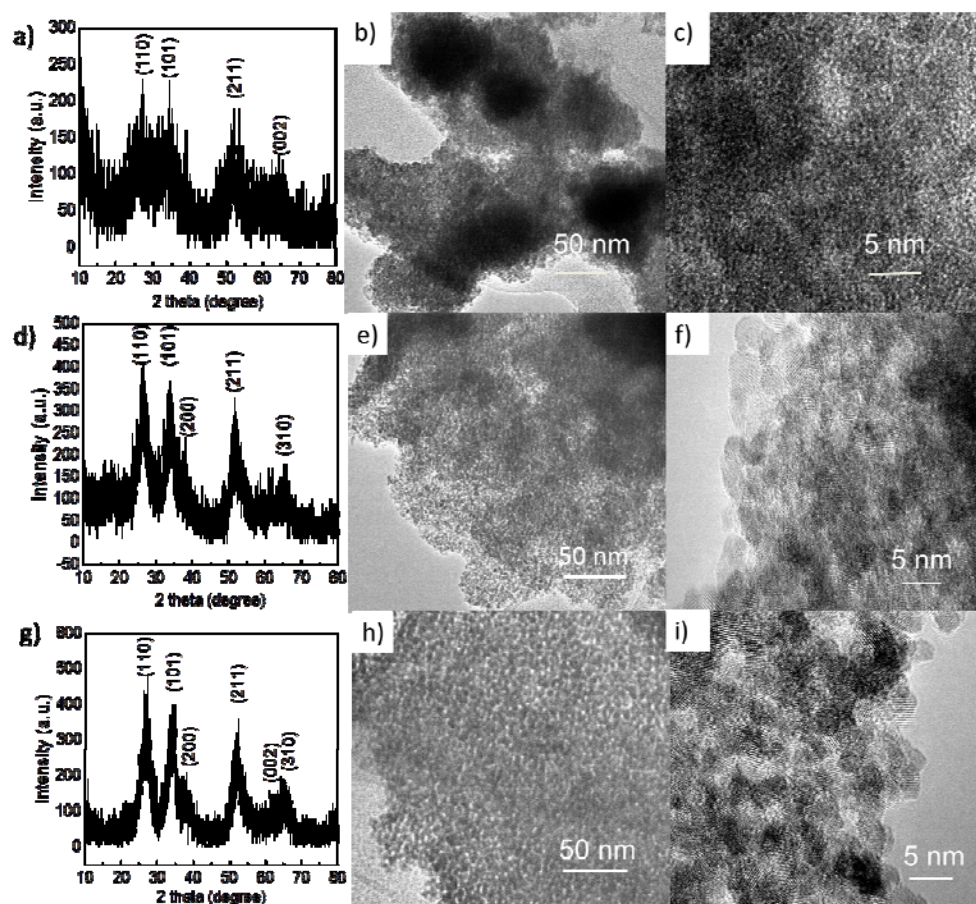

**Fig. S1** The mesoporous  $\text{SnO}_2$  nanomaterials prepared through terminating the reaction. After 1 hour (a - c): (a) XRD pattern of the mesoporous  $\text{SnO}_2$ . (b) TEM image and (c) HR-TEM image of the mesoporous  $\text{SnO}_2$ . After 3 hour (d - f): (d) XRD pattern of the mesoporous  $\text{SnO}_2$ . (e) TEM image and (f) HR-TEM image of the mesoporous  $\text{SnO}_2$ . After 5 hour (g - i): (g) XRD pattern of the mesoporous  $\text{SnO}_2$ . (h) TEM image and (i) HR-TEM image of the mesoporous  $\text{SnO}_2$ .

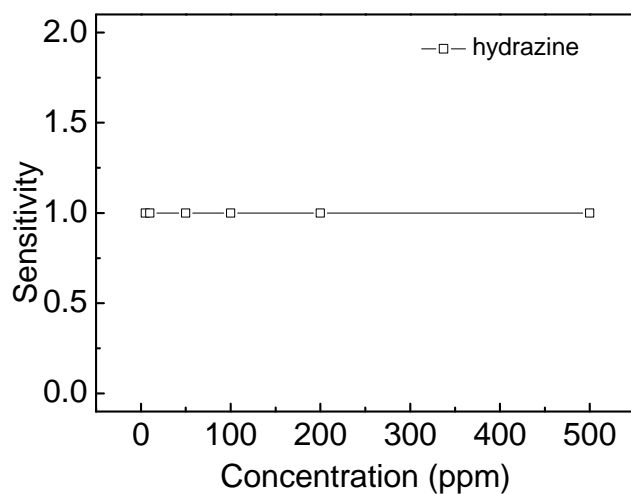

**Fig. S2** Sensitivity versus different  $\text{N}_2\text{H}_4$  concentration of of the commercial  $\text{SnO}_2$

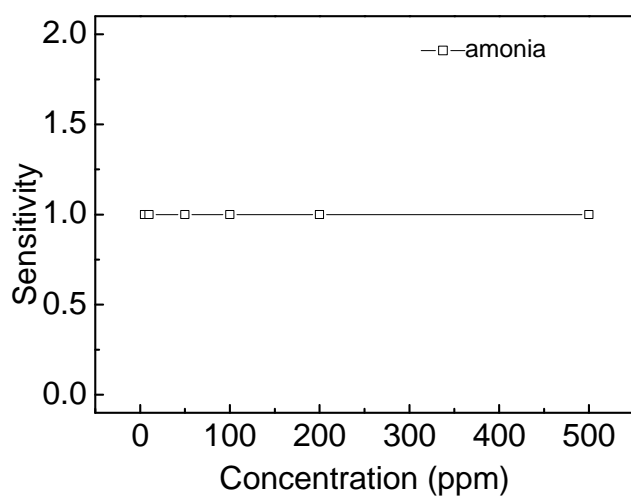

**Fig. S3** Sensitivity versus different  $\text{NH}_3$  concentration of of the commercial  $\text{SnO}_2$

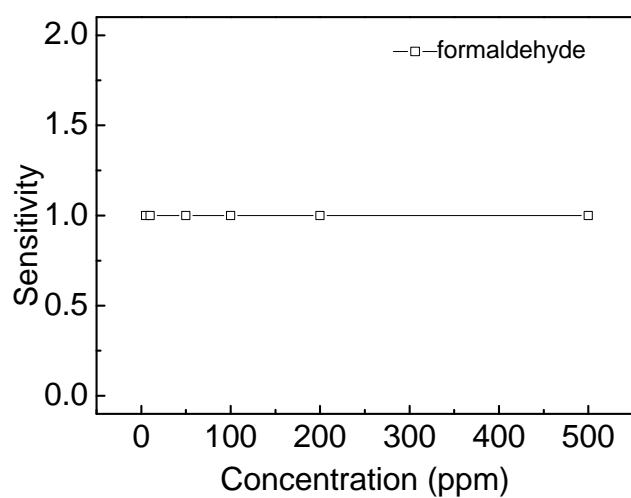

**Fig. S4** Sensitivity versus different  $\text{HCHO}$  concentration of of the commercial  $\text{SnO}_2$

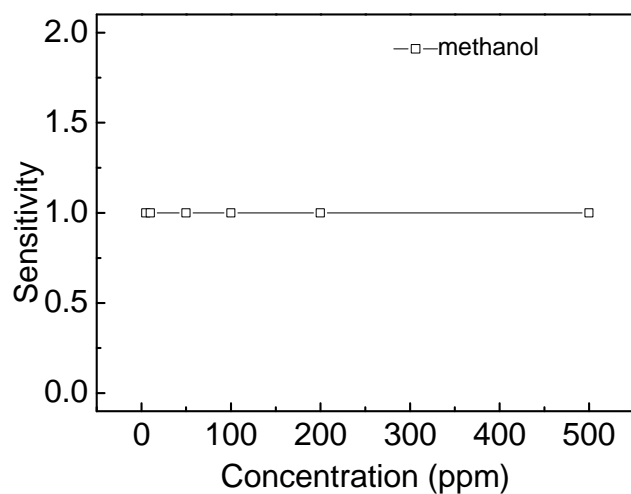

**Fig. S5** Sensitivity versus different CH<sub>3</sub>OH concentration of of the commercial SnO<sub>2</sub>
